# Supplementary material
Source: HighWire-hosted journal article supplement (https://bmjopen.bmj.com/content/7/12/e018502)
Supplement: inline-supplementary-material-1 [file inline-supplementary-material-1.pdf]

**Supplementary Table 1** Self-reported medical history by sex and year

|                                | 2009       |            | 2010       |            | 2011       |            | 2012       |               |
|--------------------------------|------------|------------|------------|------------|------------|------------|------------|---------------|
|                                | Men        | Women      | Men        | Women      | Men        | Women      | Men        | Women         |
| Family disease history (N, %)  |            |            |            |            |            |            |            |               |
| Heart disease                  | 30 (13.4)  | 60 (17.7)  | 22 (9.8)   | 60 (17.7)  | 25 (11.2)  | 64 (18.9)  | 33 (14.7)  | 60 (17.7)     |
| Brain disease                  | 31 (13.8)  | 55 (16.2)  | 33 (14.7)  | 56 (16.5)  | 29 (13.0)  | 52 (15.3)  | 42 (18.8)  | 67 (19.8)     |
| Hypertension                   | 69 (30.8)  | 126 (37.2) | 67 (29.9)  | 123 (36.3) | 76 (33.9)  | 138 (40.7) | 74 (33.0)  | 146 (43.1)    |
| Diabetes                       | 33 (14.7)  | 54 (15.9)  | 38 (17.0)  | 56 (16.5)  | 34 (15.2)  | 57 (16.8)  | 36 (16.1)  | 61 (18.0)     |
| Hyperlipidemia                 | 4 (1.8)    | 11 (3.2)   | 3 (1.3)    | 13 (3.8)   | 4 (1.8)    | 15 (4.4)   | 6 (2.7)    | 14 (4.1)      |
| Use of medicines (N, %)        |            |            |            |            |            |            |            |               |
| Hypertension                   | 74 (33.0)  | 85 (25.1)  | 80 (35.7)  | 96 (28.3)  | 90 (40.2)  | 109 (32.2) | 99 (44.2)  | 124 (36.6)*   |
| Diabetes                       | 17 (7.6)   | 7 (2.1)    | 18 (8.0)   | 10 (3.0)   | 23 (10.3)  | 10 (3.0)   | 19 (8.5)   | 10 (3.0)      |
| Hyperlipidemia                 | 27 (12.1)  | 85 (25.1)  | 38 (17.0)  | 95 (28.0)  | 42 (18.8)  | 96 (28.4)  | 53 (23.7)  | 120 (35.4)*   |
| Treatment status (N, %)        |            |            |            |            |            |            |            |               |
| Hypertension                   |            |            |            |            |            |            |            |               |
| None                           | 145 (64.7) | 241 (71.1) | 139 (62.1) | 233 (68.7) | 128 (57.1) | 218 (64.3) | 120 (53.6) | 202 (59.6)    |
| Left untreated                 | 3 (1.3)    | 5 (1.5)    | 5 (2.2)    | 6 (1.8)    | 4 (1.8)    | 5 (1.5)    | 3 (1.3)    | 8 (2.4)       |
| Recovered                      | 1 (0.5)    | 6 (1.8)    | 0 (0.0)    | 3 (0.9)    | 1 (0.5)    | 5 (1.5)    | 1 (0.5)    | 3 (0.9)       |
| Receiving outpatient treatment | 75 (33.5)  | 87 (25.7)  | 80 (35.7)  | 97 (28.6)  | 91 (40.6)  | 111 (32.7) | 100 (44.6) | 126 (37.2)    |
| Diabetes                       |            |            |            |            |            |            |            |               |
| None                           | 199 (88.8) | 327 (96.5) | 200 (89.3) | 327 (96.5) | 196 (87.5) | 326 (96.2) | 199 (88.8) | 320 (94.7)    |
| Left untreated                 | 4 (1.8)    | 1 (0.3)    | 2 (0.9)    | 0 (0.0)    | 3 (1.3)    | 0 (0.0)    | 3 (1.3)    | 2 (0.6)       |
| Recovered                      | 0 (0.0)    | 1 (0.3)    | 1 (0.5)    | 0 (0.0)    | 0 (0.0)    | 0 (0.0)    | 0 (0.0)    | 0 (0.0)       |
| Receiving outpatient treatment | 21 (9.4)   | 10 (3.0)   | 21 (9.4)   | 12 (3.5)   | 25 (11.2)  | 13 (3.8)   | 22 (9.8)   | 16 (4.7)      |
| Hyperlipidemia                 |            |            |            |            |            |            |            |               |
| None                           | 162 (72.3) | 211 (62.2) | 163 (72.8) | 203 (59.9) | 155 (69.2) | 196 (57.8) | 144 (64.3) | 164 (48.4)*** |
| Left untreated                 | 28 (12.5)  | 34 (10.0)  | 17 (7.6)   | 39 (11.5)  | 24 (10.7)  | 37 (10.9)  | 21 (9.4)   | 44 (13.0)***  |
| Recovered                      | 4 (1.8)    | 3 (0.9)    | 3 (1.3)    | 0 (0.0)    | 0 (0.0)    | 7 (2.1)    | 2 (0.9)    | 7 (2.1)***    |
| Receiving outpatient treatment | 30 (13.4)  | 91 (26.8)  | 41 (18.3)  | 97 (28.6)  | 45 (20.1)  | 99 (29.2)  | 57 (25.5)  | 124 (36.6)*** |
| Heart disease                  |            |            |            |            |            |            |            |               |
| None                           | 209 (93.3) | 330 (97.4) | 211 (94.2) | 327 (96.5) | 205 (91.5) | 324 (95.6) | 203 (90.6) | 327 (96.5)    |

|                                | 2009       |            | 2010       |            | 2011       |            | 2012       |            |
|--------------------------------|------------|------------|------------|------------|------------|------------|------------|------------|
|                                | Men        | Women      | Men        | Women      | Men        | Women      | Men        | Women      |
| (Continued from previous page) |            |            |            |            |            |            |            |            |
| Left untreated                 | 2 (0.9)    | 1 (0.3)    | 0 (0.0)    | 2 (0.6)    | 4 (1.8)    | 2 (0.6)    | 0 (0.0)    | 2 (0.6)    |
| Recovered                      | 1 (0.5)    | 1 (0.3)    | 0 (0.0)    | 0 (0.0)    | 2 (0.9)    | 1 (0.3)    | 1 (0.5)    | 1 (0.3)    |
| Receiving outpatient treatment | 12 (5.4)   | 7 (2.1)    | 13 (5.8)   | 10 (3.0)   | 13 (5.8)   | 12 (3.5)   | 20 (8.9)   | 9 (2.7)    |
| Brain disease                  |            |            |            |            |            |            |            |            |
| None                           | 211 (94.2) | 335 (98.8) | 214 (95.5) | 335 (98.8) | 215 (95.5) | 332 (97.9) | 212 (94.6) | 333 (98.2) |
| Left untreated                 | 0 (0.0)    | 0 (0.0)    | 0 (0.0)    | 0 (0.0)    | 0 (0.0)    | 0 (0.0)    | 0 (0.0)    | 0 (0.0)    |
| Recovered                      | 4 (1.8)    | 2 (0.6)    | 3 (1.3)    | 1 (0.3)    | 1 (0.5)    | 3 (0.9)    | 3 (1.3)    | 2 (0.6)    |
| Receiving outpatient treatment | 9 (4.0)    | 2 (0.6)    | 7 (2.1)    | 3 (0.9)    | 8 (3.6)    | 4 (1.2)    | 9 (4.0)    | 4 (1.2)    |
| Eye disease                    |            |            |            |            |            |            |            |            |
| None                           | 194 (86.6) | 276 (81.4) | 193 (86.2) | 264 (77.9) | 185 (82.6) | 245 (72.3) | 174 (77.7) | 247 (72.9) |
| Left untreated                 | 8 (3.6)    | 11 (3.2)   | 4 (1.8)    | 13 (3.8)   | 4 (1.8)    | 15 (4.4)   | 5 (2.2)    | 11 (3.2)   |
| Recovered                      | 10 (4.5)   | 7 (2.1)    | 8 (3.6)    | 7 (2.1)    | 8 (3.6)    | 11 (3.2)   | 12 (5.4)   | 12 (3.5)   |
| Receiving outpatient treatment | 12 (5.4)   | 45 (13.3)  | 19 (8.5)   | 55 (16.2)  | 27 (12.1)  | 68 (20.1)  | 33 (14.7)  | 69 (20.4)  |
| Kidney disease                 |            |            |            |            |            |            |            |            |
| None                           | 214 (95.5) | 337 (99.4) | 215 (96.0) | 334 (98.5) | 216 (96.4) | 335 (98.8) | 215 (96.0) | 331 (98.0) |
| Left untreated                 | 1 (0.5)    | 0 (0.0)    | 1 (0.5)    | 0 (0.0)    | 1 (0.5)    | 0 (0.0)    | 1 (0.5)    | 0 (0.0)    |
| Recovered                      | 6 (2.7)    | 2 (0.6)    | 6 (2.7)    | 4 (1.2)    | 5 (2.2)    | 1 (0.3)    | 3 (1.3)    | 4 (1.2)    |
| Receiving outpatient treatment | 3 (1.3)    | 0 (0.0)    | 2 (0.9)    | 1 (0.3)    | 2 (0.9)    | 3 (0.9)    | 5 (2.2)    | 3 (0.9)    |
| Respiratory disease            |            |            |            |            |            |            |            |            |
| None                           | 219 (97.8) | 330 (97.4) | 218 (97.3) | 329 (97.1) | 213 (95.5) | 328 (96.8) | 215 (96.0) | 326 (96.2) |
| Left untreated                 | 1 (0.5)    | 1 (0.3)    | 1 (0.5)    | 2 (0.6)    | 1 (0.5)    | 1 (0.3)    | 0 (0.0)    | 1 (0.3)    |
| Recovered                      | 1 (0.5)    | 6 (1.8)    | 3 (1.3)    | 3 (0.9)    | 3 (1.3)    | 6 (1.8)    | 2 (0.9)    | 3 (0.9)    |
| Receiving outpatient treatment | 3 (1.3)    | 2 (0.6)    | 2 (0.9)    | 5 (1.5)    | 6 (2.7)    | 4 (1.2)    | 7 (3.1)    | 9 (2.7)    |
| Gastrointestinal disease       |            |            |            |            |            |            |            |            |
| None                           | 182 (81.3) | 303 (89.4) | 184 (82.1) | 303 (89.4) | 187 (83.5) | 302 (89.1) | 176 (78.6) | 293 (86.7) |
| Left untreated                 | 2 (0.9)    | 1 (0.3)    | 1 (0.5)    | 0 (0.0)    | 2 (0.9)    | 3 (0.9)    | 3 (1.3)    | 3 (0.9)    |
| Recovered                      | 30 (13.4)  | 22 (6.5)   | 31 (13.8)  | 27 (8.0)   | 23 (10.3)  | 18 (5.3)   | 30 (13.4)  | 25 (7.4)   |
| Receiving outpatient treatment | 10 (4.5)   | 13 (3.8)   | 8 (3.6)    | 9 (2.7)    | 12 (5.4)   | 16 (4.7)   | 15 (6.7)   | 17 (5.0)   |
| Colorectal disease             |            |            |            |            |            |            |            |            |

|                                | 2009        |             | 2010       |             | 2011       |            | 2012        |             |
|--------------------------------|-------------|-------------|------------|-------------|------------|------------|-------------|-------------|
|                                | Men         | Women       | Men        | Women       | Men        | Women      | Men         | Women       |
| (Continued from previous page) |             |             |            |             |            |            |             |             |
| None                           | 199 (88.8)  | 325 (95.9)  | 199 (88.8) | 316 (93.2)  | 197 (88.0) | 321 (94.7) | 188 (83.9)  | 320 (94.4)  |
| Left untreated                 | 3 (1.3)     | 3 (0.9)     | 1 (0.5)    | 2 (0.6)     | 3 (1.3)    | 4 (1.2)    | 3 (1.3)     | 1 (0.3)     |
| Recovered                      | 21 (9.4)    | 10 (3.0)    | 21 (9.4)   | 18 (5.3)    | 20 (8.9)   | 13 (3.8)   | 27 (12.1)   | 16 (4.7)    |
| Receiving outpatient treatment | 1 (0.5)     | 1 (0.3)     | 3 (1.3)    | 3 (0.9)     | 4 (1.8)    | 1 (0.3)    | 6 (2.7)     | 2 (0.6)     |
| Liver disease                  |             |             |            |             |            |            |             |             |
| None                           | 217 (96.9)  | 334 (98.5)  | 217 (96.9) | 332 (97.9)  | 215 (96.0) | 333 (98.2) | 215 (96.0)  | 335 (98.8)  |
| Left untreated                 | 1 (0.5)     | 0 (0.0)     | 0 (0.0)    | 0 (0.0)     | 0 (0.0)    | 1 (0.3)    | 1 (0.5)     | 0 (0.0)     |
| Recovered                      | 2 (0.9)     | 2 (0.6)     | 1 (0.5)    | 5 (1.5)     | 3 (1.3)    | 2 (0.6)    | 2 (0.9)     | 2 (0.6)     |
| Receiving outpatient treatment | 4 (1.8)     | 3 (0.9)     | 6 (2.7)    | 2 (0.6)     | 6 (2.7)    | 3 (0.9)    | 6 (2.7)     | 2 (0.6)     |
| Blood disease                  |             |             |            |             |            |            |             |             |
| None                           | 223 (99.6)  | 338 (99.7)  | 223 (99.6) | 338 (99.7)  | 222 (99.0) | 338 (99.7) | 220 (98.2)  | 339 (100.0) |
| Left untreated                 | 0 (0.0)     | 0 (0.0)     | 0 (0.0)    | 0 (0.0)     | 1 (0.5)    | 0 (0.0)    | 1 (0.5)     | 0 (0.0)     |
| Recovered                      | 0 (0.0)     | 0 (0.0)     | 1 (0.5)    | 1 (0.3)     | 0 (0.0)    | 1 (0.3)    | 0 (0.0)     | 0 (0.0)     |
| Receiving outpatient treatment | 1 (0.5)     | 1 (0.3)     | 0 (0.0)    | 0 (0.0)     | 1 (0.5)    | 0 (0.0)    | 3 (1.3)     | 0 (0.0)     |
| Gout                           |             |             |            |             |            |            |             |             |
| None                           | 204 (91.1)  | 336 (99.1)  | 205 (91.5) | 337 (99.4)  | 205 (91.5) | 337 (99.4) | 200 (89.3)  | 337 (99.4)  |
| Left untreated                 | 6 (2.7)     | 0 (0.0)     | 3 (1.3)    | 0 (0.0)     | 3 (1.3)    | 0 (0.0)    | 6 (2.7)     | 0 (0.0)     |
| Recovered                      | 2 (0.9)     | 0 (0.0)     | 2 (0.9)    | 0 (0.0)     | 2 (0.9)    | 0 (0.0)    | 2 (0.9)     | 0 (0.0)     |
| Receiving outpatient treatment | 12 (5.4)    | 3 (0.9)     | 14 (6.3)   | 2 (0.6)     | 14 (6.3)   | 2 (0.6)    | 16 (7.1)    | 2 (0.6)     |
| Anemia                         |             |             |            |             |            |            |             |             |
| None                           | 221 (98.7)  | 311 (91.7)  | 223 (99.6) | 313 (92.3)  | 222 (99.1) | 316 (93.2) | 221 (98.7)  | 319 (94.1)  |
| Left untreated                 | 2 (0.9)     | 4 (1.2)     | 1 (0.5)    | 7 (2.1)     | 2 (0.9)    | 1 (0.3)    | 2 (0.9)     | 1 (0.3)     |
| Recovered                      | 0 (0.0)     | 21 (6.2)    | 0 (0.0)    | 14 (4.1)    | 0 (0.0)    | 17 (5.0)   | 1 (0.5)     | 16 (4.7)    |
| Receiving outpatient treatment | 1 (0.5)     | 3 (0.9)     | 0 (0.0)    | 5 (1.5)     | 0 (0.0)    | 5 (1.5)    | 0 (0.0)     | 3 (0.9)     |
| Chronic kidney disease         |             |             |            |             |            |            |             |             |
| No                             | 224 (100.0) | 339 (100.0) | 223 (99.5) | 339 (100.0) | 223 (99.5) | 338 (99.7) | 224 (100.0) | 339 (100.0) |
| Yes                            | 0 (0.0)     | 0 (0.0)     | 1 (0.5)    | 0 (0.0)     | 1 (0.5)    | 1 (0.3)    | 0 (0.0)     | 0 (0.0)     |

\* p<0.05, \*\* p<0.01, \*\*\* p<0.001 for the difference between baseline vs. 2011 and baseline vs. 2012, for men and women, separately (Chi-squared test or Fisher's exact test).

**Supplementary Table 2** Self-reported lifestyle by sex and year

|                                               | 2009       |            | 2010       |            | 2011       |               | 2012       |             |
|-----------------------------------------------|------------|------------|------------|------------|------------|---------------|------------|-------------|
|                                               | Men        | Women      | Men        | Women      | Men        | Women         | Men        | Women       |
| Personal habits (N, %)                        |            |            |            |            |            |               |            |             |
| Smoking                                       |            |            |            |            |            |               |            |             |
| No                                            | 178 (79.5) | 327 (96.5) | 182 (81.3) | 325 (95.9) | 187 (83.5) | 328 (96.8)    | 189 (84.4) | 329 (97.1)  |
| Yes                                           | 46 (20.5)  | 12 (3.5)   | 42 (18.8)  | 14 (4.1)   | 37 (16.5)  | 11 (3.2)      | 35 (15.6)  | 10 (3.0)    |
| Alcohol consumption                           |            |            |            |            |            |               |            |             |
| None                                          | 38 (17.0)  | 115 (33.9) | 28 (12.5)  | 107 (31.6) | 30 (13.4)  | 91 (26.8)     | 37 (16.5)  | 104 (30.7)  |
| Rarely                                        | 21 (9.4)   | 149 (44.0) | 28 (12.5)  | 145 (42.8) | 27 (12.1)  | 171 (50.4)    | 28 (12.5)  | 151 (44.5)  |
| Sometimes                                     | 62 (27.7)  | 51 (15.0)  | 63 (28.1)  | 64 (18.9)  | 60 (26.8)  | 54 (15.9)     | 51 (22.8)  | 59 (17.4)   |
| Everyday                                      | 103 (46.0) | 24 (7.1)   | 105 (46.9) | 23 (6.8)   | 107 (47.8) | 23 (6.8)      | 108 (48.2) | 25 (7.4)    |
| Lifestyle (N, %)                              |            |            |            |            |            |               |            |             |
| High weight gain (Q1) <sup>1</sup>            | 72 (32.1)  | 84 (24.8)  | 77 (34.4)  | 84 (24.8)  | 79 (35.3)  | 97 (28.7)     | 81 (36.2)  | 83 (24.5)   |
| Moderate intensity exercise (Q2) <sup>2</sup> | 97 (43.3)  | 122 (36.0) | 110 (49.1) | 125 (36.9) | 96 (42.9)  | 104 (30.8)    | 92 (41.1)  | 127 (37.5)  |
| Low intensity exercise (Q3) <sup>3</sup>      | 105 (46.9) | 110 (32.5) | 106 (47.3) | 115 (33.9) | 91 (40.6)  | 90 (26.7)*    | 87 (38.8)  | 99 (29.2)   |
| Walk speed (Q4) <sup>4</sup>                  | 110 (49.1) | 154 (45.4) | 114 (50.9) | 147 (43.4) | 109 (48.7) | 140 (41.4)    | 107 (48.0) | 154 (45.4)  |
| Small weight gain/loss (Q5) <sup>5</sup>      | 47 (21.0)  | 58 (17.1)  | 36 (16.1)  | 66 (19.5)  | 49 (21.9)  | 77 (22.8)     | 46 (20.5)  | 85 (25.1)   |
| Good sleep (Q6) <sup>6</sup>                  | 181 (80.8) | 260 (76.7) | 176 (78.6) | 256 (75.5) | 161 (71.9) | 213 (63.0)*** | 166 (74.1) | 227 (67.0)* |
| Late evening meal (Q7) <sup>7</sup>           | 45 (20.1)  | 56 (16.5)  | 49 (21.9)  | 57 (16.8)  | 45 (20.1)  | 42 (12.5)     | 55 (24.6)  | 51 (15.1)   |
| Midnight snack (Q8) <sup>8</sup>              | 16 (7.1)   | 36 (10.6)  | 18 (8.0)   | 28 (8.3)   | 20 (9.0)   | 39 (11.5)     | 18 (8.1)   | 22 (6.5)    |
| Breakfast skip (Q9) <sup>9</sup>              | 7 (3.1)    | 9 (2.7)    | 5 (2.2)    | 11 (3.2)   | 6 (2.7)    | 13 (3.8)      | 8 (3.6)    | 13 (3.8)    |
| Eating speed (Q10) <sup>10</sup>              |            |            |            |            |            |               |            |             |
| Normal                                        | 137 (61.2) | 229 (67.6) | 144 (64.3) | 224 (66.1) | 133 (59.4) | 223 (66.0)    | 133 (59.4) | 224 (66.1)  |
| Fast                                          | 63 (28.1)  | 85 (25.1)  | 57 (25.5)  | 80 (23.6)  | 69 (30.8)  | 82 (24.3)     | 64 (28.6)  | 84 (24.8)   |
| Slow                                          | 24 (10.7)  | 25 (7.4)   | 23 (10.3)  | 35 (10.3)  | 22 (9.8)   | 33 (9.8)      | 27 (12.1)  | 31 (9.1)    |

\* p<0.05, \*\* p<0.01, \*\*\* p<0.001 for the difference between 2010 vs. 2011 and 2010 vs. 2012, for men and women, separately (Chi-squared test or Fisher's exact test).

<sup>1</sup>Q1: Have you gained ≥10 kg since you were 20 years old?

<sup>2</sup>Q2: Have you been exercising at least 2 days per week, at least 30 minutes each at an intensity that causes a slight sweat, for at least 1 year?

<sup>3</sup>Q3: Do you walk for at least 1 hour every day or have equivalent physical activities in your daily life?

<sup>4</sup>Q4: Do you walk faster than people of your age and sex?

<sup>5</sup>Q5: Have you had a weight gain or loss of  $\geq 3$  kg over the last year?

<sup>6</sup>Q6: Do you feel refreshed after a night's sleep?

<sup>7</sup>Q7: Do you have an evening meal within 2 hours before bedtime 3 days or more per week?

<sup>8</sup>Q8: Do you eat after the evening meal (have a fourth meal) 3 days or more per week?

<sup>9</sup>Q9: Do you skip breakfast 3 days or more per week?

<sup>10</sup>Q10: How fast do you eat compared to others?

**Supplementary Table 3** Cardiovascular disease (CVD) risk point for men, D'Agostino et al. (2008) <sup>33</sup>

| Point | HDL<br>(mg/dL) | Total<br>cholesterol<br>(mg/dL) | SBP without<br>treatment*<br>(mmHg) | SBP with<br>treatment*<br>(mmHg) | Smoking<br>status | Diabetic<br>status |
|-------|----------------|---------------------------------|-------------------------------------|----------------------------------|-------------------|--------------------|
| -2    | >60            |                                 | <120                                |                                  |                   |                    |
| -1    | 50–59          |                                 |                                     |                                  |                   |                    |
| 0     | 45–49          | <200                            | 120–129                             | <120                             | No                | No                 |
| 1     | 35–44          |                                 | 130–139                             |                                  |                   |                    |
| 2     | <35            | ≥ 200                           | 140–159                             | 120–129                          |                   | Yes                |
| 3     |                |                                 | ≥ 160                               | 130–139                          |                   |                    |
| 4     |                |                                 |                                     | 140–159                          | Yes               |                    |
| 5     |                |                                 |                                     | ≥ 160                            |                   |                    |

\* Treatment indicates use of medicines for hypertension. HDL: high density lipoprotein cholesterol, SBP: systolic blood pressure

**Supplementary Table 4** Cardiovascular disease (CVD) risk point for women, D'Agostino et al. (2008) <sup>33</sup>

| Point | HDL<br>(mg/dL) | Total<br>cholesterol<br>(mg/dL) | SBP without<br>treatment*<br>(mmHg) | SBP with<br>treatment*<br>(mmHg) | Smoking<br>status | Diabetic<br>status |
|-------|----------------|---------------------------------|-------------------------------------|----------------------------------|-------------------|--------------------|
| -3    |                |                                 | <120                                |                                  |                   |                    |
| -2    | >60            |                                 |                                     |                                  |                   |                    |
| -1    | 50–59          |                                 |                                     | <120                             |                   |                    |
| 0     | 45–49          | <200                            | 120–129                             |                                  | No                | No                 |
| 1     | 35–44          |                                 | 130–139                             |                                  |                   |                    |
| 2     | <35            |                                 | 140–149                             | 120–129                          |                   |                    |
| 3     |                | ≥ 200                           |                                     | 130–139                          | Yes               |                    |
| 4     |                |                                 | 150–159                             |                                  |                   | Yes                |
| 5     |                |                                 | ≥ 160                               | 140–149                          |                   |                    |
| 6     |                |                                 |                                     | 150–159                          |                   |                    |
| 7     |                |                                 |                                     | ≥ 160                            |                   |                    |

\* Treatment indicates use of medicines for hypertension. HDL: high density lipoprotein cholesterol, SBP: systolic blood pressure

**Supplementary Table 5** Comparison of demographic and clinical characteristics between included and excluded participants in baseline (2009 and 2010) by sex

|                                     | Included (2009 and 2010) |              | Excluded (2009 and 2010) |               |
|-------------------------------------|--------------------------|--------------|--------------------------|---------------|
|                                     | Men                      | Women        | Men                      | Women         |
| Total participants (N, %)           | 224 (39.8)               | 339 (60.2)   | 2466 (42.8)              | 3297 (57.2)   |
| Age (mean, SD)                      | 64.8 (5.9)               | 63.1 (6.1)   | 63.8 (8.3)*              | 63.1 (8.0)    |
| Clinical characteristics (mean, SD) |                          |              |                          |               |
| BMI [kg/m <sup>2</sup> ]            | 23.5 (2.6)               | 22.7 (2.9)   | 23.9 (3.1)*              | 23.3 (3.4)*** |
| SBP [mmHg]                          | 131.9 (15.2)             | 128.7 (15.6) | 134.3 (15.4)*            | 130.5 (15.3)* |
| DBP [mmHg]                          | 78.5 (8.9)               | 75.4 (9.0)   | 79.7 (9.2)*              | 76.1 (8.8)    |
| HbA1c [%]                           | 5.1 (0.6)                | 5.1 (0.4)    | 5.2 (0.8)**              | 5.1 (0.6)*    |
| HDL [mg/dL]                         | 58.7 (14.2)              | 65.5 (14.6)  | 56.4 (13.9)*             | 63.2 (14.0)** |
| LDL [mg/dL]                         | 122.9 (31.7)             | 127.0 (29.8) | 117.7 (30.1)*            | 127.6 (29.4)  |
| TG [mg/dL]                          | 108.8 (57.6)             | 103.4 (65.7) | 125.1 (92.8)***          | 105.2 (58.3)  |
| AST [IU/L]                          | 25.2 (13.3)              | 22.7 (6.2)   | 26.8 (15.3)              | 23.2 (8.4)    |
| ALT [IU/L]                          | 22.1 (14.7)              | 18.4 (8.3)   | 24.7 (15.9)**            | 19.1 (12.0)   |
| γGT [IU/L]                          | 43.7 (47.3)              | 22.5 (14.0)  | 52.7 (83.1)*             | 24.6 (25.5)*  |
| Abdominal circumference [cm]        | 84.6 (7.2)               | 82.9 (8.0)   | 85.8 (8.2)*              | 84.1 (9.2)*   |

\* p<0.05, \*\* p<0.01, \*\*\* p<0.001 for the difference between included participants and excluded participants in baseline (2009 and 2010), for men and women, separately (un-paired t-test). The baseline data was defined as the average value of the data of 2009 and 2010. SD: standard deviation, BMI: body mass index, SBP: systolic blood pressure, DBP: diastolic blood pressure, HbA1c: hemoglobin A1c, HDL: high density lipoprotein, LDL: low density lipoprotein, TG: triglyceride, AST: aspartate transaminase, ALT: alanine aminotransferase, γGT: gamma-glutamyl transferase.

**Supplementary Table 6** Sensitivity analysis of regression models for cardiovascular disease (CVD)  
risk point for men and women

| Variable                        | Men (n=791) |               |         | Women (n=1,125) |               |         |
|---------------------------------|-------------|---------------|---------|-----------------|---------------|---------|
|                                 | Coefficient | 95% CI        | P-value | Coefficient     | 95% CI        | P-value |
| Year                            |             |               |         |                 |               |         |
| Baseline*                       | Reference   |               |         | Reference       |               |         |
| 2011                            | -0.11       | -0.33 to 0.12 | 0.35    | -0.04           | -0.26 to 0.19 | 0.75    |
| 2012                            | -0.09       | -0.25 to 0.07 | 0.25    | 0.10            | -0.05 to 0.25 | 0.20    |
| Age                             | 0.01        | -0.02 to 0.04 | 0.46    | 0.07            | 0.05 to 0.09  | <0.001  |
| BMI                             | 0.20        | 0.15 to 0.25  | <0.001  | 0.26            | 0.22 to 0.30  | <0.001  |
| Family history of heart disease |             |               |         |                 |               |         |
| No                              | Reference   |               |         | Reference       |               |         |
| Yes                             | 0.28        | -0.04 to 0.59 | 0.09    | 0.40            | 0.13 to 0.66  | <0.05   |
| Use of medicines                |             |               |         |                 |               |         |
| Diabetes                        |             |               |         |                 |               |         |
| No                              | Reference   |               |         | Reference       |               |         |
| Yes                             | 4.35        | 3.92 to 4.77  | <0.001  | 5.64            | 5.08 to 6.19  | <0.001  |
| Hyperlipidemia                  |             |               |         |                 |               |         |
| No                              | Reference   |               |         | Reference       |               |         |
| Yes                             | 1.48        | 1.21 to 1.74  | <0.001  | 2.09            | 1.86 to 2.32  | <0.001  |
| Alcohol consumption             |             |               |         |                 |               |         |
| None                            | Reference   |               |         | Reference       |               |         |
| Rarely                          | 0.09        | -0.26 to 0.44 | 0.63    | 0.07            | -0.14 to 0.28 | 0.51    |
| Sometimes                       | 0.04        | -0.28 to 0.37 | 0.79    | 0.02            | -0.27 to 0.31 | 0.89    |
| Everyday                        | 0.22        | -0.11 to 0.54 | 0.19    | -0.06           | -0.54 to 0.42 | 0.82    |

\* Baseline indicates the average CVD risk point in 2009 and 2010. CI: confidence interval, SD: standard deviation, BMI: body mass index
